# Supplementary material for: Human Neonatal MR1T Cells Have Diverse TCR Usage, are Less Cytotoxic and are Unable to Respond to Many Common Childhood Pathogens
Source: Research Square preprint supplement (doi:10.21203/rs.3.rs-6265058/v1), 2025-04-01
Supplement: Supplementary file 1 [file 8ce6a9b655ba9a1a0cf61d36.xlsx]

## Sheet: Figure 1C
Cluster	Adult	Cordblood	Total	Percent Adult	Percent Cord Blood
0	1203	20	1223	98.3647	1.63532
1	909	1	910	99.8901	0.10989
2	0	543	543	0	100
3	0	327	327	0	100
4	2	314	316	0.632911	99.3671
5	0	264	264	0	100
6	42	2	44	95.4545	4.54545
7	1	42	43	2.32558	97.6744
8	43	0	43	100	0

## Sheet: Figure 4A-C
Figure 3A
	Non-TRAV1-2	Non-TRAV1-2	Non-TRAV1-2	Non-TRAV1-2	Non-TRAV1-2	TRAV1-2	TRAV1-2	TRAV1-2	TRAV1-2	TRAV1-2
	Donor 1	Donor 2	Donor 3	Donor 4	Donor 5	Donor 1	Donor 2	Donor 3	Donor 4	Donor 5
TRAJ33	0	0.0240964	0.0247253	0	0.030303	0.555556	0.727273	0.574074	0	0.663717
TRAJ20	0.0952381	0.060241	0.0357143	0	0.0757576	0	0	0.166667	0.2	0.115044
TRAJ12	0	0	0.00549451	0	0.030303	0.444444	0.181818	0.157407	1	0.176991
Other	0.904762	0.915663	0.934066	1	0.863636	0	0.0909091	0.138889	0	0.0442478
Figure 3B
TRAV1-2+TRAJ
	Cord Blood	Cord Blood	Cord Blood	Cord Blood	Cord Blood	Adult	Adult	Adult	Adult	Adult
TRAJ33	0.625	0.571429	0.607595	0	0.62963	0.824	0.896907	0.847458	0.804348	0.787611
TRAJ12	0.375	0.285714	0.177215	1	0.209877	0.128	0.041237	0.016949	0.108696	0.168142
TRAJ20	0	0	0.151899	0	0.135802	0.032	0.061856	0.118644	0.054348	0.039823
Other	0	0.142857	0.063291	0	0.024691	0.016	0	0.016949	0.032609	0.004425
Figure 3C
TRAV1-2+TRBV
	Cord Blood	Cord Blood	Cord Blood	Cord Blood	Cord Blood	Adult	Adult	Adult	Adult	Adult
TRBV6-4	0.125	0.285714	0.272727	0	0.207792	0.432692	0.239437	0.30597	0.271186	0.339394
TRBV20-1	0	0	0.075758	0	0.077922	0.163462	0.126761	0.104478	0.288136	0.175758
TRBV6-1	0.125	0	0.106061	0.5	0.376623	0.192308	0.070423	0.156716	0.135593	0.066667
TRBV6-2	0.25	0.142857	0.136364	0	0.103896	0.048077	0.140845	0.044776	0.033898	0.060606
Other	0.5	0.571429	0.409091	0.5	0.233766	0.163462	0.422535	0.38806	0.271186	0.357576

## Sheet: Figure 6A
TRAV
TRAV1-2	0.4
TRAV12-3	0.276923
TRAV26-2	0.169231
TRAV5	0.061538
TRAV12-1	0.046154
TRAV14DV4	0.046154
TRAJ
TRAJ12	0.354839
TRAJ43	0.193548
TRAJ24	0.177419
TRAJ20	0.096774
TRAJ31	0.064516
TRAJ8	0.048387
CDR3a
CAVMDSSYKLIF	0.415094
CAMGATDSWGKLQF	0.207547
CILRDDSNNDMRF	0.207547
CASNDYKLSF	0.113208
CAESKSFQKLVF	0.056604
TRBV
TRBV4-1b	0.198276
TRBV20-1b	0.12069
TRBV6-2	0.086207
TRBV5-1	0.077586
TRBV7-9b	0.077586
TRBV6-5	0.068966
TRBV6-4b	0.051724
TRBV19b	0.043103
TRBV28	0.043103
TRBV4-2	0.043103
TRBV6-1	0.043103
TRBV14	0.034483
TRBV4-3	0.034483
TRBV27	0.025862
TRBV5-4b	0.025862
TRBV9	0.025862

## Sheet: Figure 8
A1 CB Clone
	No Blocking	No Blocking	No Blocking	MR1 Blocking	MR1 Blocking	MR1 Blocking	IgG2a Blocking	IgG2a Blocking	IgG2a Blocking
E. coli	425	446	601	25.5	39.5	52	336.25	528.5	552
S. aureus	3.5	1	3	3.5	0.5	1	0.25	3	2.5
S. pneumoniae	0.5	0	0	0.75	0	0.5	0.25	0	0
PHA	917	871	871.5
Mtb Aux	1.25	32.5	1.75	0	2.5	0	4.5	10.5	4.5
M. smegmatis	599	734	533	103	211.5	167	590	618.5	650.5
PL1	0	1	0	1.25	3	1.75	0	3.5	0.75
DZ	703	819.5	694	1.25	20	41.5	726	669	756.5
PHA	697	809.5	725.5
A2 CB Clone
	No Blocking	No Blocking	No Blocking	MR1 Blocking	MR1 Blocking	MR1 Blocking	IgG2a Blocking	IgG2a Blocking	IgG2a Blocking
E. coli	102.5	114	129.5	1.5	0	13.25	89.5	128.5	129.5
S. aureus	2	0.25	2	0	0	14.75	0	13	0.75
S. pneumoniae	1	0	3	0	0	10.75	0	1	2.5
PHA	619.5	607.25	592.25
Mtb Aux	1	0.5	0	1.5	0	0	0.5	3.5	0
M. smegmatis	430	495.5	303	37	34	37	450	390	384.5
PL1	1.5	0	0	2	0	0	1	0	5
DZ	1	0	1	3.5	0	1	1	0	0
PHA	628.5	666	531.5
A4 CB Clone
	No Blocking	No Blocking	No Blocking	MR1 Blocking	MR1 Blocking	MR1 Blocking	IgG2a Blocking	IgG2a Blocking	IgG2a Blocking
E. coli	11.5	0	13.5	0	0	0.5	0	0.5	15
S. aureus	3	0	3.5	0	0	0	4	0	7
S. pneumoniae	11	0	30.5	0	0	0	10	11	11.5
PHA	209	334.5	347
Mtb Aux	14	0	0	0	0	0	8.5	0	2.25
M. smegmatis	39.5	36	3.5	38.5	0	17.5	12	0	19
PL1	236	372	217.5	0	0	0	163	335.5	224.5
DZ	246.5	426.5	541.5	0	0	0	240	307.5	241
PHA	331	502.5	347
G11 Adult Clone
	No Blocking	No Blocking	No Blocking	MR1 Blocking	MR1 Blocking	MR1 Blocking	IgG2a Blocking	IgG2a Blocking	IgG2a Blocking
E. coli	858.5	911	1040	660	546	827.5	809.5	946	959
S. aureus	402.5	541.5	610	5.75	38.5	108.5	379.5	652	569
S. pneumoniae	271.5	210.5	463	0	0	18.5	205	267	402
PHA	1051.5	997	1074.5
Mtb Aux	660	905	502	99	241.5	60.5	679.5	896	669.5
M. smegmatis	1115.5	1143	1079.5	1050	1143	1002	1100.5	1143	1010
PL1	4.5	3.5	0	3.5	0	0	2.5	5	0
DZ	774.5	929.5	417.5	10.5	26.5	0	603	902.5	634
PHA	1096	1113	1044

## Sheet: Supplemental Figure 1
CD8
Donor	TRAV	Negative	Positive
Cord Blood	Non-TRAV1-2	590	184
Cord Blood	TRAV1-2	132	119
Adult	Non-TRAV1-2	71	195
Adult	TRAV1-2	232	625
CD4
Donor	TRAV	Negative	Positive
Cord Blood	Non-TRAV1-2	212	562
Cord Blood	TRAV1-2	135	116
Adult	Non-TRAV1-2	235	31
Adult	TRAV1-2	819	38

## Sheet: Supplemental Figure 2
	Expanded Clonotypes (> 2 identical CDR3)	Non-expanded Clonotypes (< 2 CDR3)
Adult Donors	107	453
CB Donors	1	959

## Sheet: Supplemental Figure 6
G11 Adult Clone
	No Blocking	No Blocking	No Blocking	MR1 Blocking	MR1 Blocking	MR1 Blocking	IgG2a Blocking	IgG2a Blocking	IgG2a Blocking
M smegmatis 1 µl	915.5	1143	1042.5	815.5	1003.5	802	918	1143	1045.5
M smegmatis 0.5 µl	914	1143	730	754.5	722	616	838	1143	745
